# Supplementary material for: Solvothermal synthesis, structure, and fluorescence properties of three d10 polymers assembled from semi-rigid V-shaped aza-bridged multicarboxylate
Source: Royal Society of Chemistry journal article supplement (doi:10.1039/c5ra02417j), 2015-01-01
Supplement: c5ra02417j1.pdf [file c5ra02417j1.pdf]

# Solvothermal Synthesis, Structure, and Fluorescence Property of Three $d^{10}$ Polymers Assembled From Semi-rigid V-shaped Aza -Bridged Multicarboxylate

Yu-Hui Tan<sup>a</sup>, Jian-Bo Xiong<sup>a</sup>, Ji-Xing Gao<sup>a</sup>, Qing Xu<sup>a</sup>, Chao-Wu Fu<sup>a</sup>, Yun-Zhi Tang<sup>a,\*</sup>, Shao-Ping Yang<sup>b,\*</sup>, He-Rui Wen<sup>a</sup>, Qing Shu<sup>a</sup>

Table SI Crystal data and structure refinement for 1-3

| Complex                                                     | 1                                                                              | 2                                                               | 3                                                                             |
|-------------------------------------------------------------|--------------------------------------------------------------------------------|-----------------------------------------------------------------|-------------------------------------------------------------------------------|
| Empirical formula                                           | C <sub>43</sub> H <sub>34</sub> Cd <sub>2</sub> N <sub>5</sub> O <sub>10</sub> | C <sub>24</sub> H <sub>19</sub> CdN <sub>3</sub> O <sub>4</sub> | C <sub>28</sub> H <sub>18</sub> Zn <sub>2</sub> N <sub>2</sub> O <sub>8</sub> |
| Formula weight                                              | 1005.55                                                                        | 525.82                                                          | 641.18                                                                        |
| Crystal system                                              | Triclinic                                                                      | Monoclinic                                                      | Monoclinic                                                                    |
| Space group                                                 | <i>P</i> -1                                                                    | <i>P</i> 2 <sub>1</sub> / <i>C</i>                              | <i>P</i> 2 <sub>1</sub> / <i>C</i>                                            |
| <i>a</i> (Å)                                                | 9.2272(3)                                                                      | 11.667(4)                                                       | 11.5015(7)                                                                    |
| <i>b</i> (Å)                                                | 10.9734(4)                                                                     | 9.677(3)                                                        | 12.6151(6)                                                                    |
| <i>c</i> (Å)                                                | 20.8598(6)                                                                     | 19.320(6)                                                       | 19.6648(13)                                                                   |
| $\alpha$ (deg)                                              | 78.118(3)                                                                      | 90                                                              | 90                                                                            |
| $\beta$ (deg)                                               | 84.743(3)                                                                      | 96.150(4)                                                       | 117.658(4)                                                                    |
| $\gamma$ (deg)                                              | 72.358(4)                                                                      | 90                                                              | 90                                                                            |
| <i>V</i> (Å <sup>3</sup> )                                  | 1968.70(11)                                                                    | 2168.7(11)                                                      | 2527.2(3)                                                                     |
| <i>D</i> <sub>calc</sub> / <i>Mgm</i> -3                    | 1.696                                                                          | 1.610                                                           | 1.685                                                                         |
| <i>Z</i>                                                    | 2                                                                              | 4                                                               | 4                                                                             |
| $\mu$ (mm <sup>-1</sup> )                                   | 1.148                                                                          | 1.043                                                           | 1.955                                                                         |
| <i>F</i> (000)                                              | 1006                                                                           | 1056                                                            | 1296                                                                          |
| Data / restraints / parameters                              | 6902 / 6 / 547                                                                 | 3711 / 1 / 289                                                  | 5757 / 22 / 361                                                               |
| GOF                                                         | 1.072                                                                          | 1.071                                                           | 1.101                                                                         |
| <i>R</i> <sub>1</sub> [ <i>I</i> > 2 $\sigma$ ( <i>I</i> )] | <i>R</i> <sub>1</sub> = 0.0435, <i>wR</i> <sub>2</sub> = 0.0998                | <i>R</i> <sub>1</sub> = 0.0319, <i>wR</i> <sub>2</sub> = 0.0643 | <i>R</i> <sub>1</sub> = 0.0634, <i>wR</i> <sub>2</sub> = 0.1356               |
| <i>wR</i> <sub>2</sub> (all data)                           | <i>R</i> <sub>1</sub> = 0.0621, <i>wR</i> <sub>2</sub> = 0.1122                | <i>R</i> <sub>1</sub> = 0.0385, <i>wR</i> <sub>2</sub> = 0.0674 | <i>R</i> <sub>1</sub> = 0.0697, <i>wR</i> <sub>2</sub> = 0.1392               |
| $\Delta\rho_{max}$ / $\Delta\rho_{min}$ (eÅ <sup>-3</sup> ) | 1.610 / -1.032                                                                 | 0.446 / -0.359                                                  | 2.452 / -1.936                                                                |

Table SII Bond lengths [Å] and angles [°] for 1-3

| <b>Complex 1</b>    |            |                 |            |
|---------------------|------------|-----------------|------------|
| <i>Bond lengths</i> |            |                 |            |
| Cd(1)-N(1)          | 2.278(5)   | Cd(1)-O(4)      | 2.315(4)   |
| Cd(1)-O(3)          | 2.323(4)   | Cd(1)-O(1)      | 2.347(4)   |
| Cd(1)-N(2)          | 2.355(4)   | Cd(1)-O(2)      | 2.389(4)   |
| Cd(2)-O(6)          | 2.222(4)   | Cd(2)-O(7)      | 2.2661(18) |
| Cd(2)-O(5)          | 2.3411(18) | Cd(2)-N(2)      | 2.267(4)   |
| Cd(2)-N(3)          | 2.290(4)   | Cd(2)-O(8)      | 2.313(4)   |
| Cd(2)-O(5)          | 2.339(4)   | Cd(2)-O(3)      | 2.350(4)   |
| <i>Bond angles</i>  |            |                 |            |
| N(1)-Cd(1)-O(4)     | 81.34(17)  | N(1)-Cd(1)-O(3) | 85.36(15)  |
| O(4)-Cd(1)-O(3)     | 112.37(15) | N(1)-Cd(1)-O(1) | 107.63(17) |
| O(4)-Cd(1)-O(1)     | 155.35(15) | O(3)-Cd(1)-O(1) | 91.52(13)  |
| N(1)-Cd(1)-N(2)     | 170.11(17) | O(4)-Cd(1)-N(2) | 91.52(15)  |
| O(3)-Cd(1)-N(2)     | 91.10(14)  | O(1)-Cd(1)-N(2) | 81.66(14)  |
| N(1)-Cd(1)-O(2)     | 94.35(16)  | O(4)-Cd(1)-O(2) | 102.27(14) |
| O(3)-Cd(1)-O(2)     | 144.85(12) | O(1)-Cd(1)-O(2) | 55.02(12)  |
| N(2)-Cd(1)-O(2)     | 93.84(14)  | O(6)-Cd(2)-O(7) | 100.62(18) |
| O(6)-Cd(2)-N(3)     | 89.27(16)  | O(7)-Cd(2)-N(3) | 139.77(17) |
| O(6)-Cd(2)-O(8)     | 131.50(18) | O(7)-Cd(2)-O(8) | 56.03(15)  |
| N(3)-Cd(2)-O(8)     | 88.34(14)  | O(6)-Cd(2)-O(5) | 133.55(16) |

|                 |            |                 |            |
|-----------------|------------|-----------------|------------|
| O(7)-Cd(2)-O(5) | 109.03(19) | N(3)-Cd(2)-O(5) | 90.32(15)  |
| O(8)-Cd(2)-O(5) | 94.90(15)  | O(6)-Cd(2)-O(3) | 83.48(17)  |
| O(7)-Cd(2)-O(3) | 105.04(16) | N(3)-Cd(2)-O(3) | 114.84(14) |
| O(8)-Cd(2)-O(3) | 139.81(15) | O(5)-Cd(2)-O(3) | 55.07(12)  |

### Complex 2

#### Bond lengths

|            |          |            |          |
|------------|----------|------------|----------|
| Cd(1)-N(2) | 2.294(3) | Cd(1)-O(4) | 2.325(2) |
| Cd(1)-N(1) | 2.326(3) | Cd(1)-O(2) | 2.328(2) |
| Cd(1)-O(1) | 2.351(2) | Cd(1)-O(3) | 2.375(2) |

#### Bond angles

|                 |           |                 |            |
|-----------------|-----------|-----------------|------------|
| N(2)-Cd(1)-O(4) | 141.90(9) | N(2)-Cd(1)-N(1) | 107.65(10) |
| O(4)-Cd(1)-N(1) | 88.77(9)  | N(2)-Cd(1)-O(2) | 97.44(10)  |
| O(4)-Cd(1)-O(2) | 118.11(9) | N(1)-Cd(1)-O(2) | 86.64(9)   |
| N(2)-Cd(1)-O(1) | 92.57(10) | O(4)-Cd(1)-O(1) | 96.69(9)   |
| N(1)-Cd(1)-O(1) | 139.22(9) | O(2)-Cd(1)-O(1) | 55.21(8)   |
| N(2)-Cd(1)-O(3) | 86.81(9)  | O(4)-Cd(1)-O(3) | 55.42(8)   |
| N(1)-Cd(1)-O(3) | 104.83(9) | O(2)-Cd(1)-O(3) | 166.02(8)  |
| O(1)-Cd(1)-O(3) | 111.47(8) |                 |            |

### Complex 3

#### Bond lengths

|              |          |              |          |
|--------------|----------|--------------|----------|
| Zn(1)-O(1)   | 1.900(4) | Zn(1)-O(5)   | 1.927(4) |
| Zn(1)-O(7)#1 | 1.930(3) | Zn(1)-O(3)   | 2.004(4) |
| Zn(2)-O(8)#1 | 1.937(4) | Zn(2)-O(6)#2 | 1.963(4) |
| Zn(2)-O(2)   | 2.002(4) | Zn(2)-O(4)#2 | 2.090(4) |
| Zn(2)-O(3)#2 | 2.245(6) | O(7)-Zn(1)#2 | 1.930(3) |
| O(3)-Zn(2)#1 | 2.245(6) | O(4)-Zn(2)#1 | 2.090(4) |
| O(6)-Zn(2)#1 | 1.963(4) | O(8)-Zn(2)#2 | 1.937(4) |

#### Bond angles

|                     |            |                     |            |
|---------------------|------------|---------------------|------------|
| O(1)-Zn(1)-O(5)     | 113.99(18) | O(1)-Zn(1)-O(7)#1   | 116.47(18) |
| O(5)-Zn(1)-O(7)#1   | 110.58(16) | O(1)-Zn(1)-O(3)     | 103.4(2)   |
| O(5)-Zn(1)-O(3)     | 102.61(18) | O(7)#1-Zn(1)-O(3)   | 108.42(16) |
| O(8)#1-Zn(2)-O(6)#2 | 93.64(16)  | O(8)#1-Zn(2)-O(2)   | 135.8(2)   |
| O(6)#2-Zn(2)-O(2)   | 100.27(17) | O(8)#1-Zn(2)-O(4)#2 | 93.99(17)  |
| O(6)#2-Zn(2)-O(4)#2 | 150.60(19) | O(2)-Zn(2)-O(4)#2   | 93.84(17)  |
| O(8)#1-Zn(2)-O(3)#2 | 122.32(18) | O(6)#2-Zn(2)-O(3)#2 | 93.52(16)  |
| O(2)-Zn(2)-O(3)#2   | 98.61(18)  | O(4)#2-Zn(2)-O(3)#2 | 58.69(16)  |

Symmetry transformations: #1 -x,y+1/2,-z+3/2 ; #2 -x,y-1/2,-z+3/2

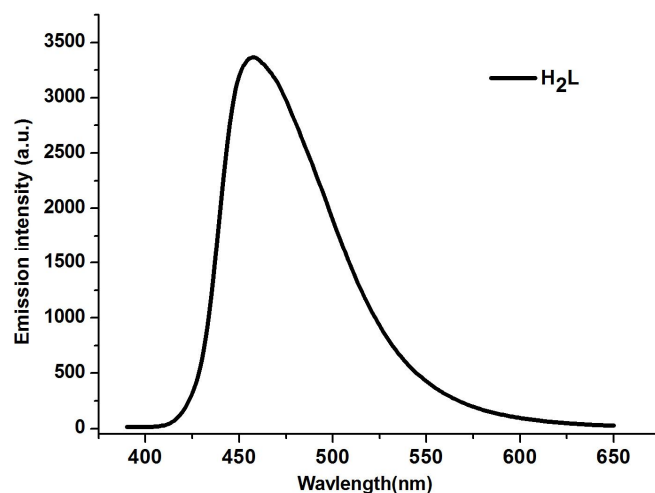

**Figure S1** Fluorescent emission spectra of H<sub>2</sub>L ligand in solid state at room temperature.

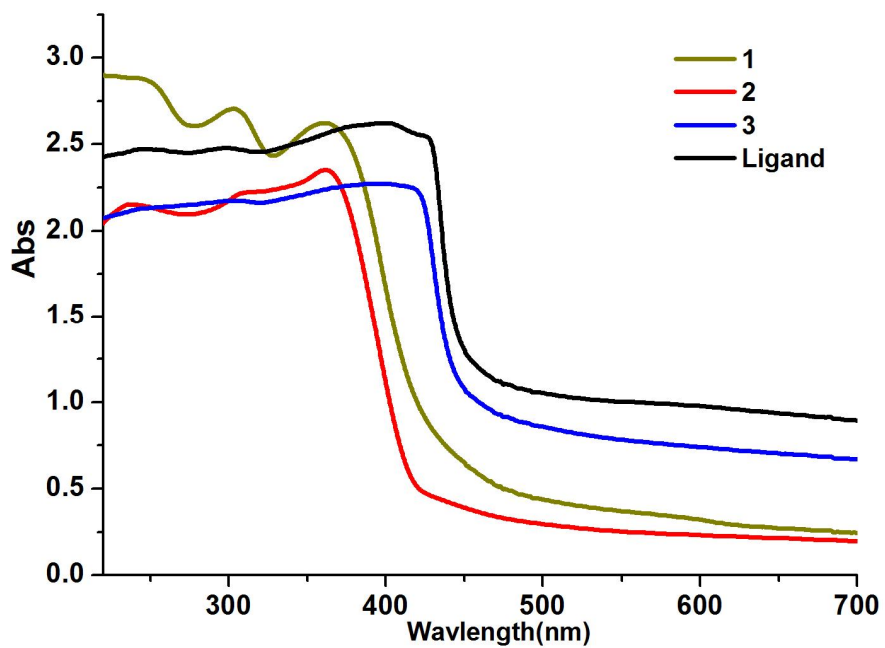

**Figure S2** Absorption spectra of free ligand and their respective complexes 1–3 i at ambient temperature.
